# Supplementary material
Source: PubMed Central journal article supplement (PMC2724842)

Supplementary Information for

Kinetic Evidence for Inter-Domain Communication in the Allosteric Regulation of  $\alpha$ -  
Isopropylmalate Synthase from *M. tuberculosis*.

Department of Biochemistry, Albert Einstein College of Medicine, 1300 Morris Park Ave.,  
Bronx, NY 10461

Table S1. Ultracentrifugation Results for Wild-Type and Mutant IPMS

| Protein             | $S_{20,w}$ |
|---------------------|------------|
| Dimer (HydroPro)    | 7.9 $S^a$  |
| Monomer (HydroPro)  | 4.3 $S^a$  |
| Wild type           | 8.5 $S$    |
| Wild type + Leucine | 8.2 $S$    |
| E218A IPMS          | 7.5 $S$    |
| E218A + Leucine     | 7.7 $S$    |
| H379A IPMS          | 8.6 $S$    |
| H379A + Leucine     | 8.1 $S$    |
| Y410F IPMS          | 8.7 $S$    |
| Y410F + Leucine     | 9.2 $S$    |

<sup>a</sup>values were calculated in Hydropro (Garcia De La Torre, J., Huertas, M. L., and Carrasco, B. (2000) Calculation of hydrodynamic properties of globular proteins from their atomic-level structure, *Biophys J* 78, 719-730.) using the coordinates of PDB file 1SR9

## Supplemental Figure Legends

Figure S1. ClustalW was used to align the amino acid sequence of  $\alpha$ -IPMS enzymes from eubacteria (*E. coli*, *S. aureus*, *S. enteric* serovar *typhimurium*, *M. tuberculosis*, *C. glutamicum*, *H. influenza*, and *R. eutropha*), archaea (*S. solfataricus* and *A. fulgidus*), plants (*A. thaliana*), and fungi (*S. cerevisiae* and *N. crassa*). Residues colored red are strictly conserved and residues colored blue are strongly similar in at least 90% of the sequences (*i.e.* only one outlier)

Figure S2. Eadie-Hofstee plot of wild-type, E218A, and H379A IPMS. The Eadie-Hofstee plot ( $v/[\alpha\text{-KIV}]$  vs.  $v$ ) is superior to the Lineweaver-Burk plot for ensuring that curvature in initial velocity replots is real (and not due to a one or two bad points) because the data are evenly weighted relative to the Lineweaver-Burk plot.

Figure S3.  $^1\text{H-NMR}$  analysis of the reaction of Y410F IPMS. The initial spectrum (upper) was taken prior to addition of enzyme. A second spectrum was taken after the reaction had reached completion (lower spectrum).





Figure S2.

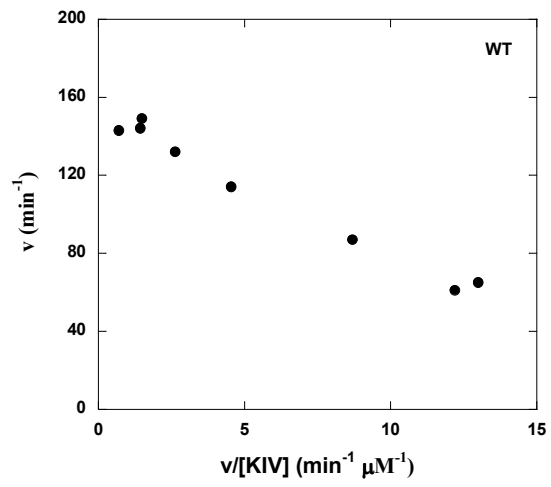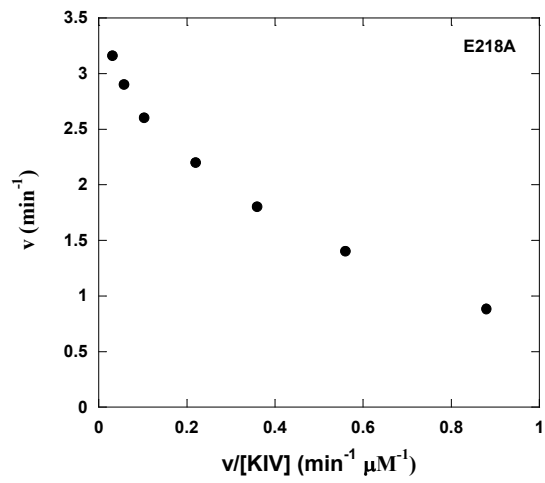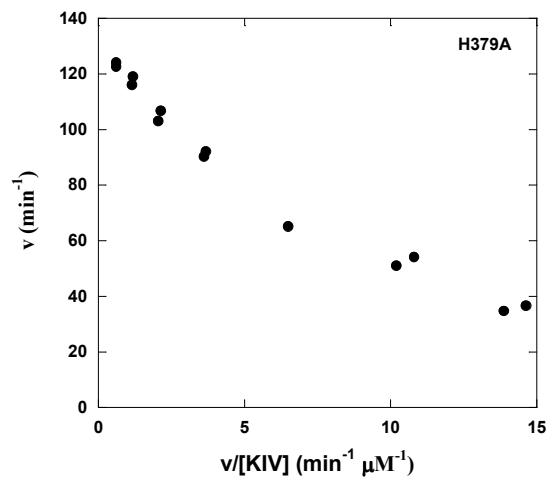

Figure S3.

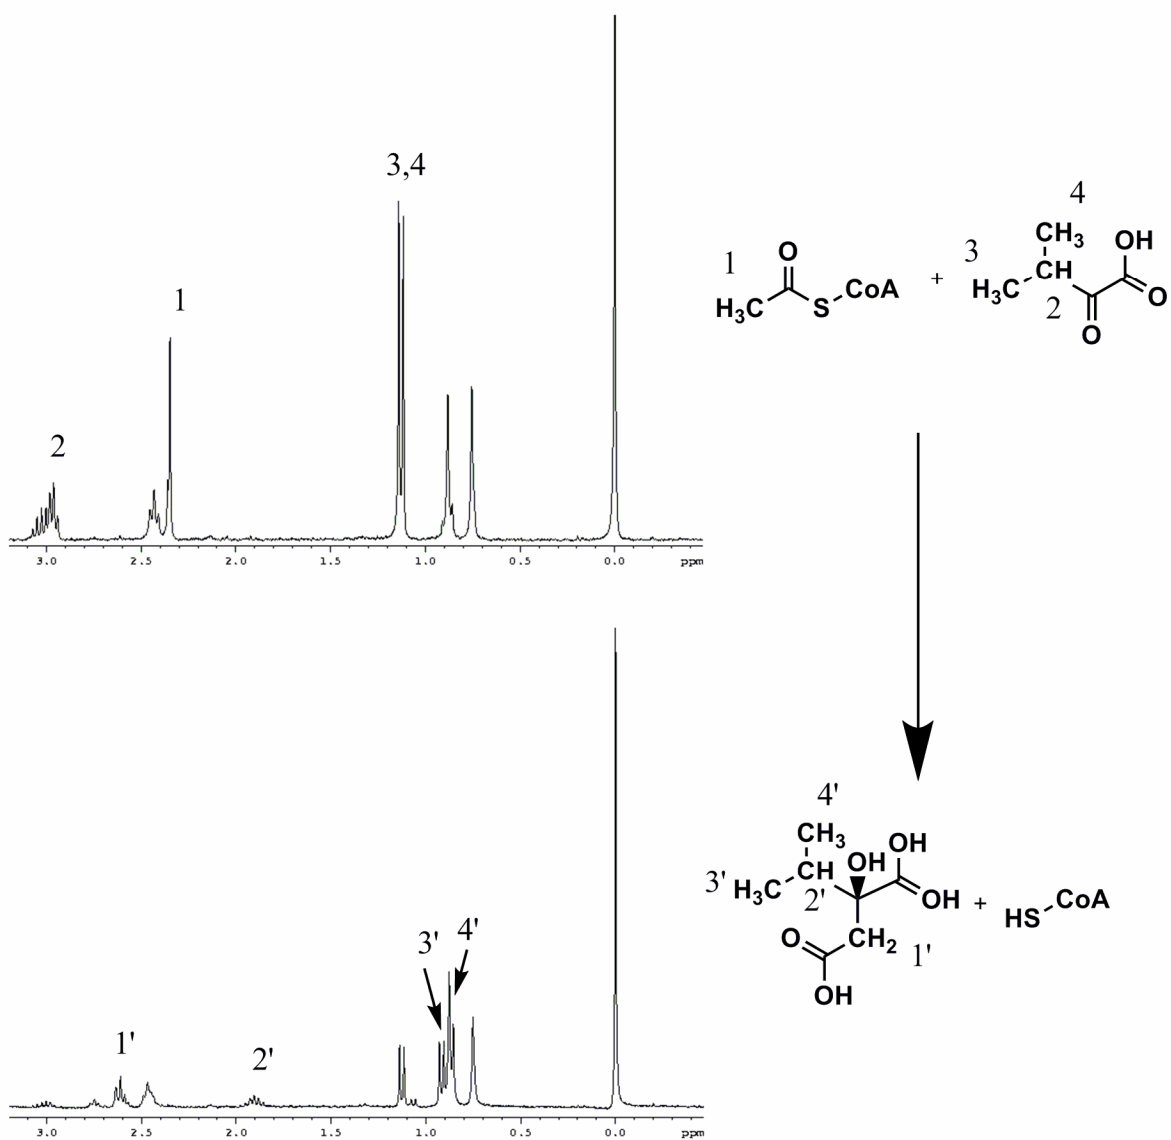

Supplement: NIHMS91367-supplement-1_si_001.pdf [file NIHMS91367-supplement-1_si_001.pdf]
